# Supplementary material
Source: Copernicus journal article supplement (doi:10.5194/hess-30-4271-2026)
Supplement: Supplementary file 1 [file hess-30-4271-2026-supplement.pdf]

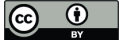

*Supplement of*

## **Disentangling the key drivers of water balance in Central Asia's Lake Balkhash: A relative contribution assessment**

**Ruibiao Yang et al.**

*Correspondence to:* Jinglu Wu ([w.jinglu@niglas.ac.cn](mailto:w.jinglu@niglas.ac.cn))

The copyright of individual parts of the supplement might differ from the article licence.

## Supplementary Material

**Table S1. Chronological calibration/training and validation periods for each hydrological station and historical period.**

| <b>River System</b> | <b>Station</b> | <b>Period</b> | <b>Calibration/training years</b> | <b>Validation years</b> | <b>Temporal Resolution</b> |
|---------------------|----------------|---------------|-----------------------------------|-------------------------|----------------------------|
| Ili                 | Ushzharma      | P1            | 1931-1958                         | 1959-1970               | Monthly, Yearly            |
| Ili                 | Ushzharma      | P2            | 1971-1984                         | 1985-1989               | Monthly                    |
| Ili                 | Ushzharma      | P3            | 1991-2011                         | 2012-2020               | Yearly                     |
| Ili                 | Kapchagay      | P1            | 1931-1958                         | 1959-1970               | Monthly, Yearly            |
| Ili                 | Kapchagay      | P2            | 1971-1984                         | 1985-1989               | Monthly                    |
| Ili                 | Kapchagay      | P3            | 1991-1997                         | 1998-2000               | Yearly                     |
| Ili                 | Dobyn          | P1            | 1931-1958                         | 1959-1970               | Yearly                     |
| Ili                 | Dobyn          | P2            | 1971-1984                         | 1985-1990               | Yearly                     |
| Ili                 | Dobyn          | P3            | 1991-2011                         | 2012-2020               | Yearly                     |
| Ili                 | Kairgan        | P1            | 1931-1958                         | 1959-1970               | Yearly                     |
| Ili                 | Kairgan        | P2            | 1971-1984                         | 1985-1990               | Yearly                     |
| Ili                 | Kairgan        | P3            | 1991-2011                         | 2012-2020               | Yearly                     |
| Ili                 | Yamate         | P1            | 1953-1964                         | 1965-1970               | Monthly                    |
| Ili                 | Yamate         | P2            | 1971-1976                         | 1977-1979               | Monthly                    |
| Ili                 | Tuohai         | P1            | 1955-1965                         | 1966-1970               | Monthly                    |
| Ili                 | Tuohai         | P2            | 1971-1984                         | 1985-1990               | Monthly, Yearly            |
| Ili                 | Tuohai         | P3            | 1991-2007                         | 2008-2015               | Yearly                     |
| Ili                 | Qiafuqihai     | P1            | 1958-1965                         | 1966-1970               | Monthly                    |
| Ili                 | Qiafuqihai     | P2            | 1971-1976                         | 1977-1979               | Monthly                    |
| Ili                 | Sliyaniya_Su   | P1            | 1936-1962                         | 1963-1970               | Monthly                    |
| Ili                 | Sliyaniya_Su   | P2            | 1971-1980                         | 1981-1986               | Monthly                    |
| Ili                 | Sarytogay      | P1            | 1935-1959                         | 1960-1970               | Monthly                    |
| Ili                 | Sarytogay      | P2            | 1971-1984                         | 1985-1989               | Monthly                    |
| Ili                 | Sarytogay      | P3            | 1991-2002                         | 2003-2008               | Monthly                    |
| Ili                 | Malybay        | P1            | 1936-1958                         | 1959-1970               | Monthly                    |
| Ili                 | Malybay        | P2            | 1971-1984                         | 1985-1989               | Monthly                    |
| Ili                 | Malybay        | P3            | 1991-2001                         | 2002-2004               | Monthly                    |
| Karatal             | Ushtobe        | P1            | 1936-1959                         | 1960-1970               | Monthly                    |
| Karatal             | Ushtobe        | P2            | 1971-1984                         | 1985-1989               | Monthly                    |
| Karatal             | Ushtobe        | P3            | 1991-1997                         | 1998-2000               | Yearly                     |
| Karatal             | Tekeli         | P1            | 1940-1962                         | 1963-1970               | Monthly                    |
| Karatal             | Tekeli         | P2            | 1971-1979                         | 1980-1986               | Monthly                    |
| Aksu                | Chann          | P1            | 1937-1959                         | 1960-1970               | Monthly                    |
| Aksu                | Chann          | P2            | 1971-1977                         | 1978-1983               | Monthly                    |
| Lepsy               | Lepsy          | P1            | 1936-1959                         | 1960-1970               | Monthly                    |
| Lepsy               | Lepsy          | P2            | 1971-1980                         | 1981-1989               | Monthly                    |
| Lepsy               | Lepsinsk       | P1            | 1936-1959                         | 1960-1970               | Monthly                    |
| Lepsy               | Lepsinsk       | P2            | 1971-1980                         | 1981-1985               | Monthly                    |
| Ayaguz              | Ayaguz         | P1            | 1949-1963                         | 1964-1970               | Yearly                     |
| Ayaguz              | Ayaguz         | P2            | 1971-1981                         | 1982-1986               | Yearly                     |

**Table S2. Period-specific training and validation performance metrics for raw SEGSWAT+ simulations and hybrid corrected simulations.**

| River System | Station      | Period | Phase      | KGE        | KGE      | NSE        | NSE      | PBIAS (%)  | PBIAS (%) |
|--------------|--------------|--------|------------|------------|----------|------------|----------|------------|-----------|
|              |              |        |            | (SEGSWAT+) | (Hybrid) | (SEGSWAT+) | (Hybrid) | (SEGSWAT+) | (Hybrid)  |
| Ili          | Ushzharma    | P1     | Training   | 0.671      | 0.913    | 0.854      | 0.929    | -16.8      | 2.54      |
| Ili          | Ushzharma    | P1     | Validation | 0.606      | 0.867    | 0.689      | 0.923    | -16.3      | 2.04      |
| Ili          | Ushzharma    | P2     | Training   | 0.624      | 0.831    | 0.703      | 0.923    | -18.34     | 7.01      |
| Ili          | Ushzharma    | P2     | Validation | 0.614      | 0.826    | 0.693      | 0.913    | -17.84     | 6.51      |
| Ili          | Ushzharma    | P3     | Training   | 0.717      | 0.848    | 0.83       | 0.858    | -12.08     | 6.5       |
| Ili          | Ushzharma    | P3     | Validation | 0.653      | 0.756    | 0.663      | 0.759    | -11.58     | 5.48      |
| Ili          | Kapchagay    | P1     | Training   | 0.596      | 0.873    | 0.735      | 0.874    | 4.81       | 4.31      |
| Ili          | Kapchagay    | P1     | Validation | 0.479      | 0.863    | 0.703      | 0.864    | 4.17       | 3.67      |
| Ili          | Kapchagay    | P2     | Training   | 0.525      | 0.814    | 0.654      | 0.815    | 4.83       | 1.79      |
| Ili          | Kapchagay    | P2     | Validation | 0.515      | 0.804    | 0.644      | 0.805    | -4.33      | -1.72     |
| Ili          | Kapchagay    | P3     | Training   | 0.245      | 0.761    | 0.255      | 0.923    | -6.97      | -6.54     |
| Ili          | Kapchagay    | P3     | Validation | 0.058      | 0.751    | 0.068      | 0.921    | 0.81       | 0.06      |
| Ili          | Dobyn        | P1     | Training   | 0.606      | 0.901    | 0.79       | 0.902    | 1.23       | 0.73      |
| Ili          | Dobyn        | P1     | Validation | 0.48       | 0.898    | 0.705      | 0.899    | 0.35       | 0.26      |
| Ili          | Dobyn        | P2     | Training   | 0.496      | 0.824    | 0.591      | 0.825    | 8.06       | 7.56      |
| Ili          | Dobyn        | P2     | Validation | 0.444      | 0.814    | 0.581      | 0.815    | -4.78      | -4.28     |
| Ili          | Dobyn        | P3     | Training   | 0.616      | 0.808    | 0.69       | 0.874    | 6.54       | 6.04      |
| Ili          | Dobyn        | P3     | Validation | 0.579      | 0.798    | 0.618      | 0.864    | 3.74       | 3.48      |
| Ili          | Kairgan      | P1     | Training   | 0.626      | 0.846    | 0.689      | 0.859    | 2.8        | 2.3       |
| Ili          | Kairgan      | P1     | Validation | 0.58       | 0.836    | 0.679      | 0.849    | -0.84      | -0.54     |
| Ili          | Kairgan      | P2     | Training   | 0.546      | 0.904    | 0.549      | 0.905    | 5.99       | 5.49      |
| Ili          | Kairgan      | P2     | Validation | 0.43       | 0.894    | 0.546      | 0.895    | 1.69       | 1.47      |
| Ili          | Kairgan      | P3     | Training   | 0.607      | 0.763    | 0.698      | 0.92     | 4.29       | 1.79      |
| Ili          | Kairgan      | P3     | Validation | 0.6        | 0.753    | 0.602      | 0.91     | 3.71       | 1.72      |
| Ili          | Yamate       | P1     | Training   | 0.547      | 0.927    | 0.708      | 0.929    | -4.35      | -3.85     |
| Ili          | Yamate       | P1     | Validation | 0.516      | 0.917    | 0.698      | 0.927    | 1.27       | 1.13      |
| Ili          | Yamate       | P2     | Training   | 0.625      | 0.928    | 0.633      | 0.929    | 5.66       | 3.13      |
| Ili          | Yamate       | P2     | Validation | 0.552      | 0.925    | 0.594      | 0.926    | 3.05       | 2.55      |
| Ili          | Tuohai       | P1     | Training   | 0.512      | 0.891    | 0.697      | 0.892    | 6.99       | 6.49      |
| Ili          | Tuohai       | P1     | Validation | 0.451      | 0.881    | 0.687      | 0.882    | -3.36      | -2.86     |
| Ili          | Tuohai       | P2     | Training   | 0.536      | 0.9      | 0.739      | 0.901    | 1.99       | 0.67      |
| Ili          | Tuohai       | P2     | Validation | 0.49       | 0.882    | 0.689      | 0.883    | 1.25       | 0.39      |
| Ili          | Tuohai       | P3     | Training   | 0.579      | 0.899    | 0.68       | 0.926    | -9.15      | -8.65     |
| Ili          | Tuohai       | P3     | Validation | 0.569      | 0.889    | 0.67       | 0.925    | 2.3        | 1.53      |
| Ili          | Qiafuqihai   | P1     | Training   | 0.562      | 0.801    | 0.738      | 0.92     | 4.85       | 4.35      |
| Ili          | Qiafuqihai   | P1     | Validation | 0.522      | 0.754    | 0.701      | 0.91     | -4.19      | -3.69     |
| Ili          | Qiafuqihai   | P2     | Training   | 0.62       | 0.849    | 0.805      | 0.85     | -3.47      | -2.97     |
| Ili          | Qiafuqihai   | P2     | Validation | 0.421      | 0.755    | 0.597      | 0.758    | -3.38      | -2.88     |
| Ili          | Sliyaniya Su | P1     | Training   | 0.598      | 0.874    | 0.767      | 0.875    | 3.15       | 1.92      |
| Ili          | Sliyaniya Su | P1     | Validation | 0.522      | 0.864    | 0.701      | 0.865    | 2.49       | 1.43      |
| Ili          | Sliyaniya Su | P2     | Training   | 0.681      | 0.804    | 0.746      | 0.805    | -4.19      | -3.07     |
| Ili          | Sliyaniya Su | P2     | Validation | 0.585      | 0.788    | 0.681      | 0.789    | -3.98      | -2.68     |

|         |           |    |            |       |       |       |       |        |       |
|---------|-----------|----|------------|-------|-------|-------|-------|--------|-------|
| Ili     | Sarytogay | P1 | Training   | 0.603 | 0.806 | 0.754 | 0.831 | 4.39   | 3.89  |
| Ili     | Sarytogay | P1 | Validation | 0.575 | 0.796 | 0.744 | 0.797 | -1.53  | -1.02 |
| Ili     | Sarytogay | P2 | Training   | 0.686 | 0.791 | 0.769 | 0.801 | -1.4   | -1.29 |
| Ili     | Sarytogay | P2 | Validation | 0.529 | 0.756 | 0.552 | 0.759 | 1.13   | 0.88  |
| Ili     | Sarytogay | P3 | Training   | 0.584 | 0.884 | 0.719 | 0.885 | 6.63   | 1.84  |
| Ili     | Sarytogay | P3 | Validation | 0.566 | 0.829 | 0.631 | 0.83  | 6.14   | 1.61  |
| Ili     | Malybay   | P1 | Training   | 0.595 | 0.837 | 0.777 | 0.838 | -3.62  | -3.12 |
| Ili     | Malybay   | P1 | Validation | 0.574 | 0.781 | 0.752 | 0.782 | -3.01  | -2.51 |
| Ili     | Malybay   | P2 | Training   | 0.47  | 0.886 | 0.674 | 0.887 | 4.34   | 3.84  |
| Ili     | Malybay   | P2 | Validation | 0.46  | 0.876 | 0.664 | 0.877 | -2.86  | -1.12 |
| Ili     | Malybay   | P3 | Training   | 0.511 | 0.892 | 0.645 | 0.925 | 3.99   | 3.86  |
| Ili     | Malybay   | P3 | Validation | 0.48  | 0.882 | 0.635 | 0.924 | -2.81  | -1.06 |
| Karatal | Ushtobe   | P1 | Training   | 0.796 | 0.912 | 0.873 | 0.921 | 16.29  | 7.99  |
| Karatal | Ushtobe   | P1 | Validation | 0.757 | 0.873 | 0.767 | 0.885 | 15.28  | 7.7   |
| Karatal | Ushtobe   | P2 | Training   | 0.696 | 0.817 | 0.853 | 0.922 | 18.06  | 9.9   |
| Karatal | Ushtobe   | P2 | Validation | 0.679 | 0.786 | 0.759 | 0.883 | 15.1   | 4.54  |
| Karatal | Ushtobe   | P3 | Training   | 0.621 | 0.83  | 0.636 | 0.84  | -20.38 | -8.59 |
| Karatal | Ushtobe   | P3 | Validation | 0.611 | 0.774 | 0.626 | 0.784 | 19.88  | 8.09  |
| Karatal | Tekeli    | P1 | Training   | 0.602 | 0.761 | 0.652 | 0.769 | -5.15  | -4.65 |
| Karatal | Tekeli    | P1 | Validation | 0.57  | 0.757 | 0.64  | 0.759 | 1.53   | 1.03  |
| Karatal | Tekeli    | P2 | Training   | 0.549 | 0.884 | 0.761 | 0.885 | 3.53   | 3.03  |
| Karatal | Tekeli    | P2 | Validation | 0.52  | 0.838 | 0.75  | 0.839 | -3.28  | -2.78 |
| Aksu    | Chann     | P1 | Training   | 0.706 | 0.754 | 0.721 | 0.784 | -11.55 | -7.31 |
| Aksu    | Chann     | P1 | Validation | 0.696 | 0.744 | 0.711 | 0.774 | -11.05 | -6.81 |
| Aksu    | Chann     | P2 | Training   | 0.662 | 0.76  | 0.672 | 0.927 | -13.84 | -7.31 |
| Aksu    | Chann     | P2 | Validation | 0.479 | 0.75  | 0.489 | 0.753 | -13.34 | -6.81 |
| Lepsey  | Lepsey    | P1 | Training   | 0.692 | 0.921 | 0.697 | 0.922 | -10.93 | -7.58 |
| Lepsey  | Lepsey    | P1 | Validation | 0.682 | 0.911 | 0.687 | 0.912 | 3.1    | 1.06  |
| Lepsey  | Lepsey    | P2 | Training   | 0.592 | 0.826 | 0.728 | 0.827 | -4.6   | -4.17 |
| Lepsey  | Lepsey    | P2 | Validation | 0.458 | 0.756 | 0.608 | 0.758 | -2.92  | -0.08 |
| Lepsey  | Lepsinsk  | P1 | Training   | 0.664 | 0.819 | 0.674 | 0.829 | 11.29  | -6.36 |
| Lepsey  | Lepsinsk  | P1 | Validation | 0.626 | 0.751 | 0.636 | 0.757 | 10.79  | -5.72 |
| Lepsey  | Lepsinsk  | P2 | Training   | 0.652 | 0.794 | 0.75  | 0.861 | 10.45  | -6.18 |
| Lepsey  | Lepsinsk  | P2 | Validation | 0.642 | 0.761 | 0.705 | 0.801 | 10.22  | -5.68 |
| Ayaguz  | Ayaguz    | P1 | Training   | 0.774 | 0.87  | 0.784 | 0.88  | -25.04 | 3.97  |
| Ayaguz  | Ayaguz    | P1 | Validation | 0.764 | 0.86  | 0.774 | 0.87  | -4.12  | -3.47 |
| Ayaguz  | Ayaguz    | P2 | Training   | 0.56  | 0.826 | 0.57  | 0.921 | -12.93 | -3.25 |
| Ayaguz  | Ayaguz    | P2 | Validation | 0.55  | 0.801 | 0.56  | 0.811 | -12.43 | 0.75  |
